# Supplementary material for: Galvanic replacement mediated growth of dendritic gold nanostructures with a three-fold symmetry and their applications to SERS
Source: Royal Society of Chemistry journal article supplement (doi:10.1039/c1ce05084b), 2011-01-01
Supplement: c1ce05084b.pdf [file c1ce05084b.pdf]

## Supporting Information

### Galvanic Replacement Mediated Growth of Dendritic Gold Nanostructures with a Three-Fold Symmetry and Their Applications to SERS

Xiangtao Bai, Liqiang Zheng\*

*Key Laboratory of Colloid and Interface Chemistry, Shandong University, Ministry of Education, Jinan, 250100, China.*

*Corresponding author: Dr. Liqiang Zheng*

*E-mail address: lqzheng@sdu.edu.cn*

*Phone number: +86-531-88366062*

#### **The calculation of EF:<sup>[S1]</sup>**

The enhancement factor (EF) values of R6G on the gold dendrites are determined using the following expression:

$$EF = (I_{\text{SERS}}/N_{\text{ads}}) / (I_{\text{bulk}}/N_{\text{bulk}})$$

where  $I_{\text{SERS}}$  is the intensity of a vibrational mode in the surface-enhanced spectrum,  $I_{\text{bulk}}$  is the intensity of the same mode in the Raman spectrum,  $N_{\text{ads}}$  is the number of molecules adsorbed and sampled on the SERS-active substrate, and  $N_{\text{bulk}}$  is the number of molecules sampled in the bulk.  $N_{\text{ads}}$  can be obtained according to the method proposed by Orendorff et al.<sup>[S2]</sup> which is

$$N_{\text{ads}} = N_{\text{d}}A_{\text{laser}}A_{\text{N}}/\sigma$$

where  $N_{\text{d}}$  is the number density of the gold nanoparticles,  $A_{\text{laser}}$  is the area of the focal spot of laser,  $A_{\text{N}}$  is the footprint area of the gold nanoparticles, and  $\sigma$  is the surface area occupied by an adsorbed R6G molecule. In order to simplify the model, we assume gold dendrites are densely packed and then  $N_{\text{d}}$  and  $A_{\text{N}}$  can be obtained.  $A_{\text{laser}}$  can be obtained from the diameter of the laser spot ( $\sim 1 \mu\text{m}$ ). The long-axis length of an R6G molecule is ca. 1.4 nm.<sup>[S3]</sup> Therefore, one can assume that in the densely

packed R6G monolayer a single R6G molecule should take no more than  $4 \text{ nm}^2$  in area, indicating that  $\sigma$  can be adopted as  $\sim 4 \text{ nm}^2/\text{molecule}$ .<sup>[S4]</sup> Then the total number of surface adsorbed molecules ( $N_{\text{ads}}$ ) within the illuminated laser spot can be obtained at  $1.96 \times 10^5$ .  $N_{\text{bulk}}$  is the molecule number of the solid R6G in the laser illumination volume. In our experiment, the laser spot is about  $1 \text{ }\mu\text{m}$  in diameter and the penetration depth is about  $2 \text{ }\mu\text{m}$ . Taking the density of the solid R6G ( $1.26 \text{ g/cm}^3$ ) into account,  $N_{\text{bulk}}$  was calculated to be about  $2.49 \times 10^9$  within the illuminated laser light. The intensity of the measured light at  $613 \text{ cm}^{-1}$  was about 14573 and 259 for SERS and ordinary Raman, respectively. Finally, the EF for the band located at  $613 \text{ cm}^{-1}$  can be calculated to be about  $7.15 \times 10^5$ . Beside, the EF for the band located at  $1365 \text{ cm}^{-1}$  is about  $2.24 \times 10^5$ , which is comparable with that of  $613 \text{ cm}^{-1}$ .

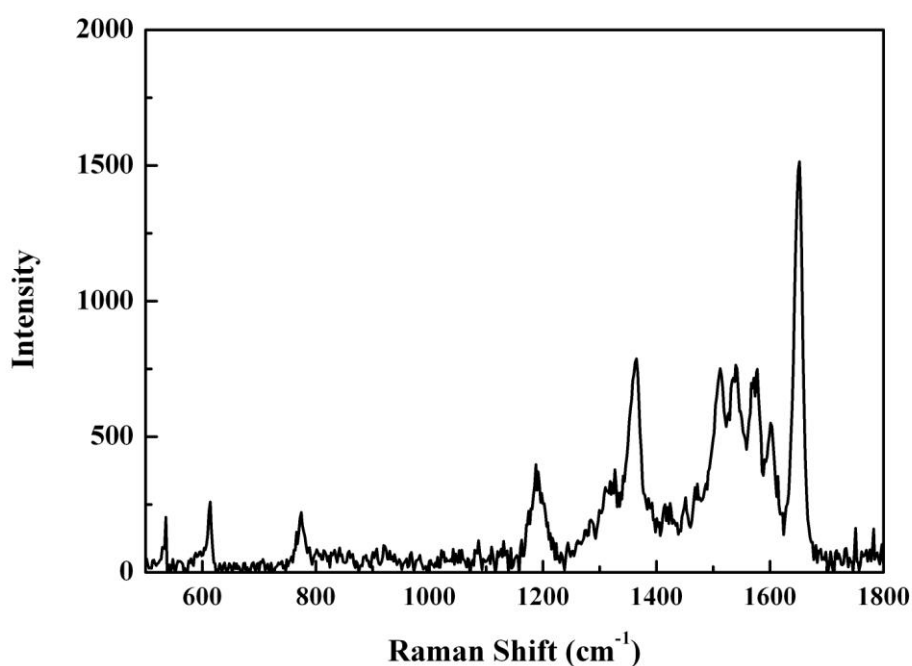

**Figure S1** Normal Raman spectrum of solid R6G

## References

- [S1] (a) Guo, S. J.; Dong, S. J.; Wang, E. K. *Cryst. Growth Des.* **2009**, *9*, 372; (b) Bai, X. T.; Li, X. W.; Zheng, L. Q. *Langmuir* **2010**, *26*, 12209.

[S2] Orendorff, C. J.; Gearheart, L. N.; Jana, R.; Murphy, C. J. *Phys. Chem. Chem. Phys.* **2006**, *8*, 165.

[S3] Sasai, R.; Fujita, T.; Iyi, N.; Itoh, H.; Takagi, K. *Langmuir* **2002**, *18*, 6578.

[S4] Kudelski, A. *Chem. Phys. Lett.* **2005**, *414*, 271.
